# Supplementary material
Source: PubMed Central journal article supplement (PMC3811288)
Supplement: AAC.00322-13_zac011132270so1.pdf [file AAC.00322-13_zac011132270so1.pdf]

## SUPPLEMENTAL MATERIAL

**Figure S1** KS levels in the plasma and air pouch exudates after GAS infection. At 12 h after hydrodynamic administration of the KS plasmid, control plasmid or saline, GAS was inoculated in the air pouch. Mice were sacrificed 24 and 48 h after infection and the plasma (**a**) and air pouch exudates (**b**) were collected for KS levels using ELISA. ND: not detectable at both 24 and 48 h.

**Figure S2** KS has no direct effect on GAS growth rate. A fresh colony of GAS was inoculated in TSBY broth overnight and then transferred to fresh TSBY broth by 1:50 dilution with or without KS. At various time points, bacterial counts were determined by measuring the absorbance at 600 nm (**a**) and by plating (**b**).

**Figure S3** KS increases the viability and reduces the apoptosis of infiltrating cells in the air pouch of GAS-infected mice. At 12 h after hydrodynamic administration of the KS plasmid, control plasmid or saline, GAS was inoculated in the air pouch, and the air pouch exudates were collected 12 h after infection ( $n = 4$ ). The infiltrating cell viability was measured by trypan blue staining (**a**) and cell apoptosis was determined by PI staining followed by flow cytometry analysis (**b**). Experiments were repeated twice. \*,  $P < 0.05$ ; \*\*,  $P < 0.01$ ; \*\*\*,  $P < 0.001$ .

**Figure S4** KS has no effect on SpeB activity, whereas SpeB cleaves KS. SpeB mutant protein C192S (**a**) and azocasein (**b**) were used as SpeB substrates. SpeB and its substrates were incubated with or without KS for 1 h at 37°C. The cleavage form of the C192S was detected by SDS-PAGE followed by coomassie blue staining. The cleavage of Azo-dye was detected by measuring the absorbance at 405 nm. (**c**) Normal human serum was added with SpeB protein (full-length form of 42 kDa), and incubated for 1 h at 37°C. SpeB auto-cleaves itself and an active form (28 kDa) can be

observed. KS was detected by specific antibody and at least three cleavage forms of KS were observed. E64 was used as a cysteine protease inhibitor.

**Figure S5** KS protects mice from SpeB-deficient GAS infection. **(a-d)** At 12 h after hydrodynamic injection, mice were infected with SpeB-deficient NZ131, SW574, ( $2.6 \times 10^8$  cfu/mouse) using an air pouch model. One mouse in pcDNA-treated group died on day 3 after infection and one in saline control group died on day 5 after infection. The diapedetic areas were photographed and measured on day 7 after infection. The skin lesions of the dead mice were determined while mice died. **(e)** At 12 h after hydrodynamic injection, mice were subcutaneously injected with SpeB-deficient A20 strain SW507 ( $3.64 \times 10^8$  cfu/mouse) and the survival rate was determined.

N=10/group. \*  $P < 0.05$

**Figure S6** KS protects mice when administrated 12 h after GAS infection. Mice were infected with GAS (NZ131;  $1 \times 10^8$  cfu/mouse) using an air pouch model and hydrodynamic injection was performed at 12 h after infection. The survival rate was determined. N=18/group. \*  $P < 0.05$

**a**

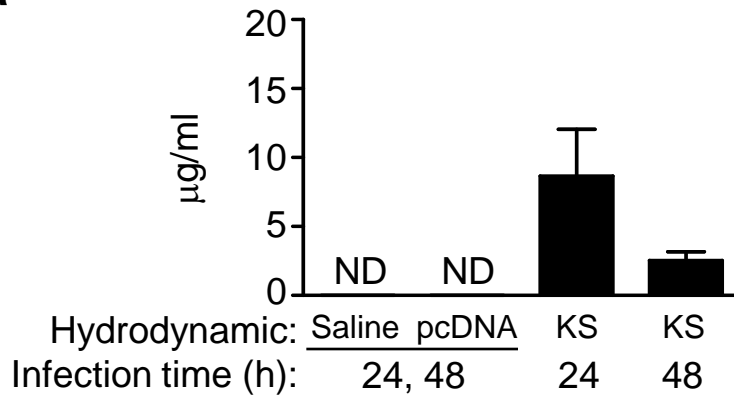

**b**

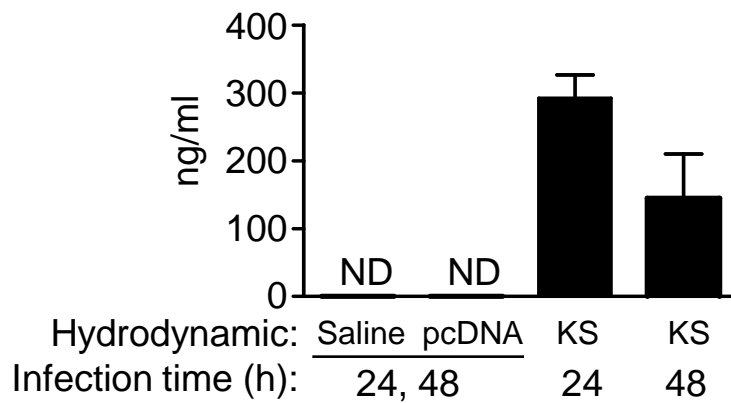

**Supplementary Figure S1**

**a**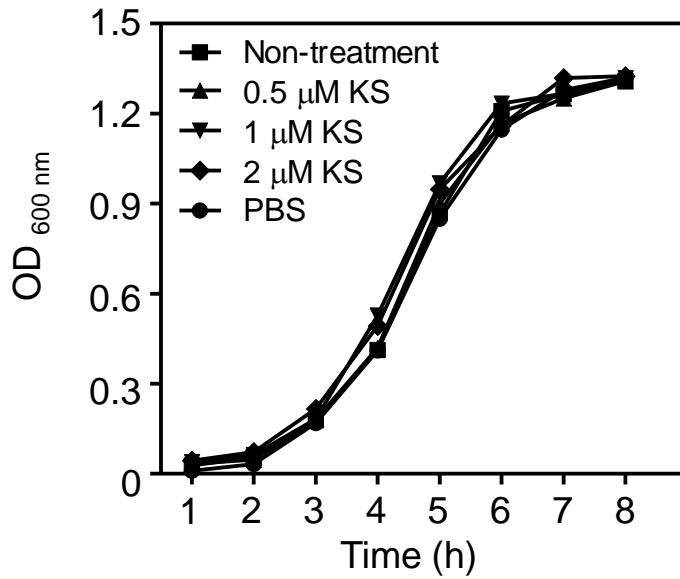**b**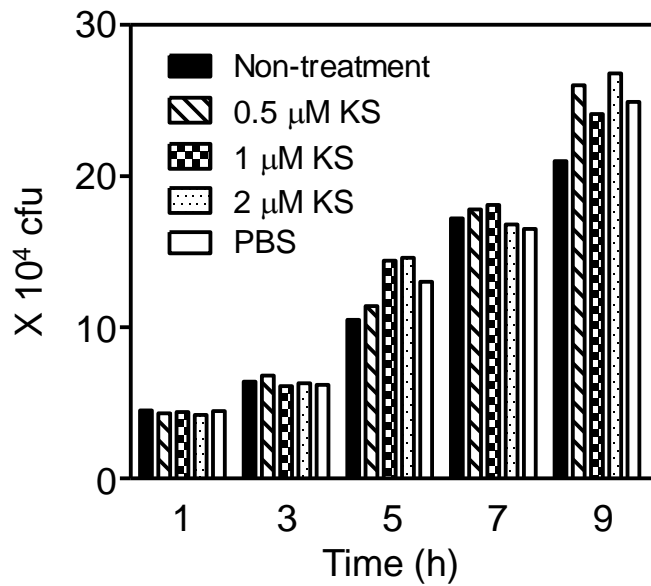**Supplementary Figure S2**

**a**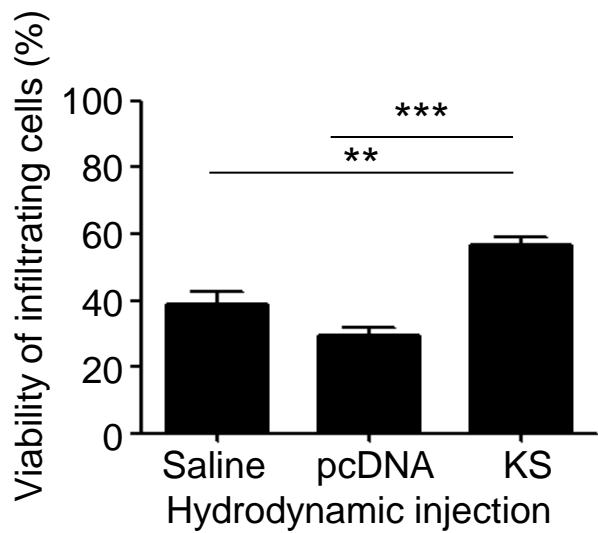**b**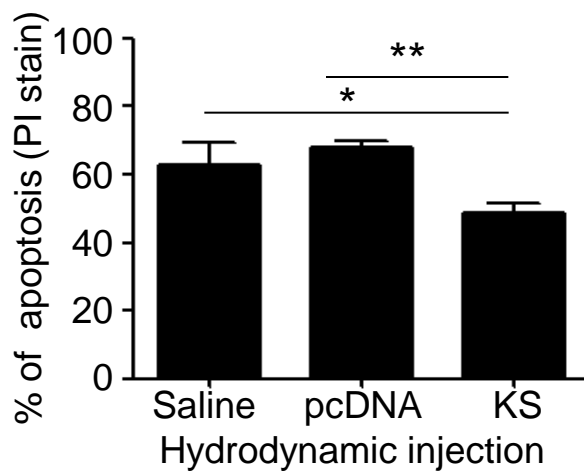**Supplementary Figure S3**

a

|                    |   |   |   |   |    |   |    |
|--------------------|---|---|---|---|----|---|----|
| SPE B (1 $\mu$ g)  | + | + | + | + | +  | + | -  |
| C192S (20 $\mu$ g) | - | + | + | + | +  | + | +  |
| KS ( $\mu$ g)      | - | - | 1 | 5 | 10 | - | 10 |
| E64 (10 $\mu$ M)   | - | - | - | - | -  | + | -  |

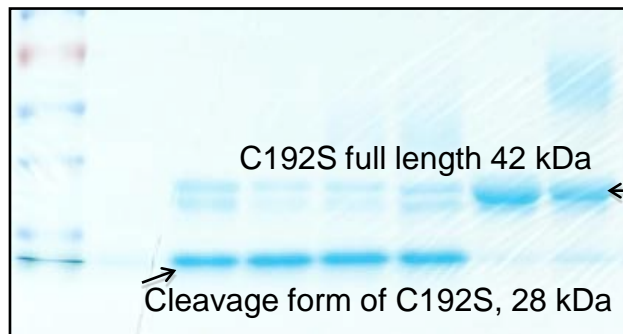

b

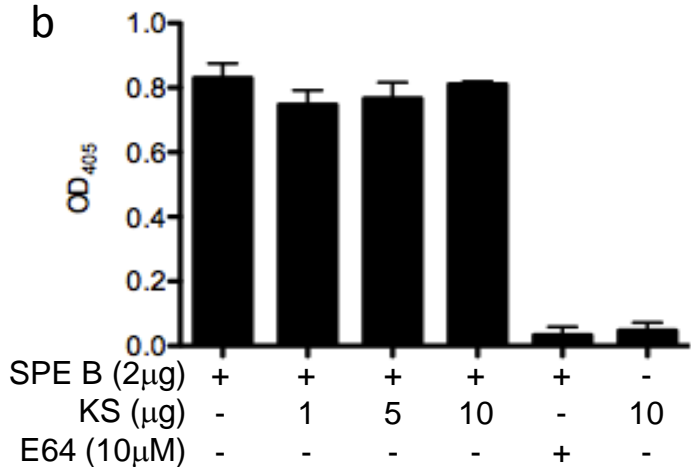

c

|                  |   |    |     |   |    |    |
|------------------|---|----|-----|---|----|----|
| Human serum      | + | -  | +   | + | +  | +  |
| SPE B ( $\mu$ g) | - | 10 | 2.5 | 5 | 10 | 10 |
| E64 (10 $\mu$ M) | - | -  | -   | - | -  | +  |

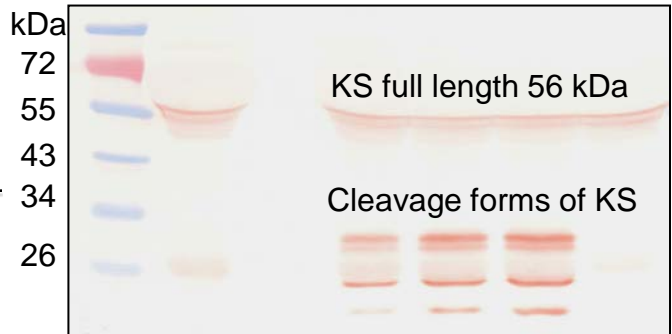 $\alpha$ -KS mAb (4G4C10)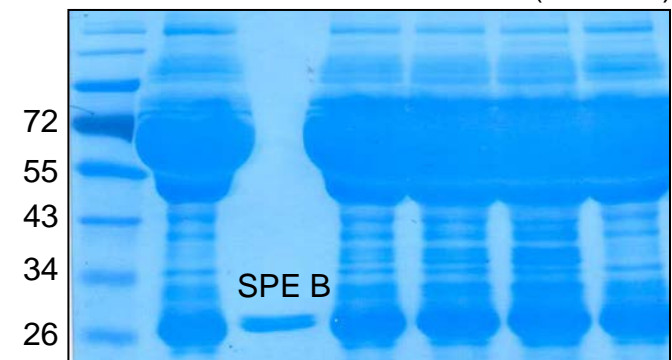

Coomassie blue

Supplementary Figure S4

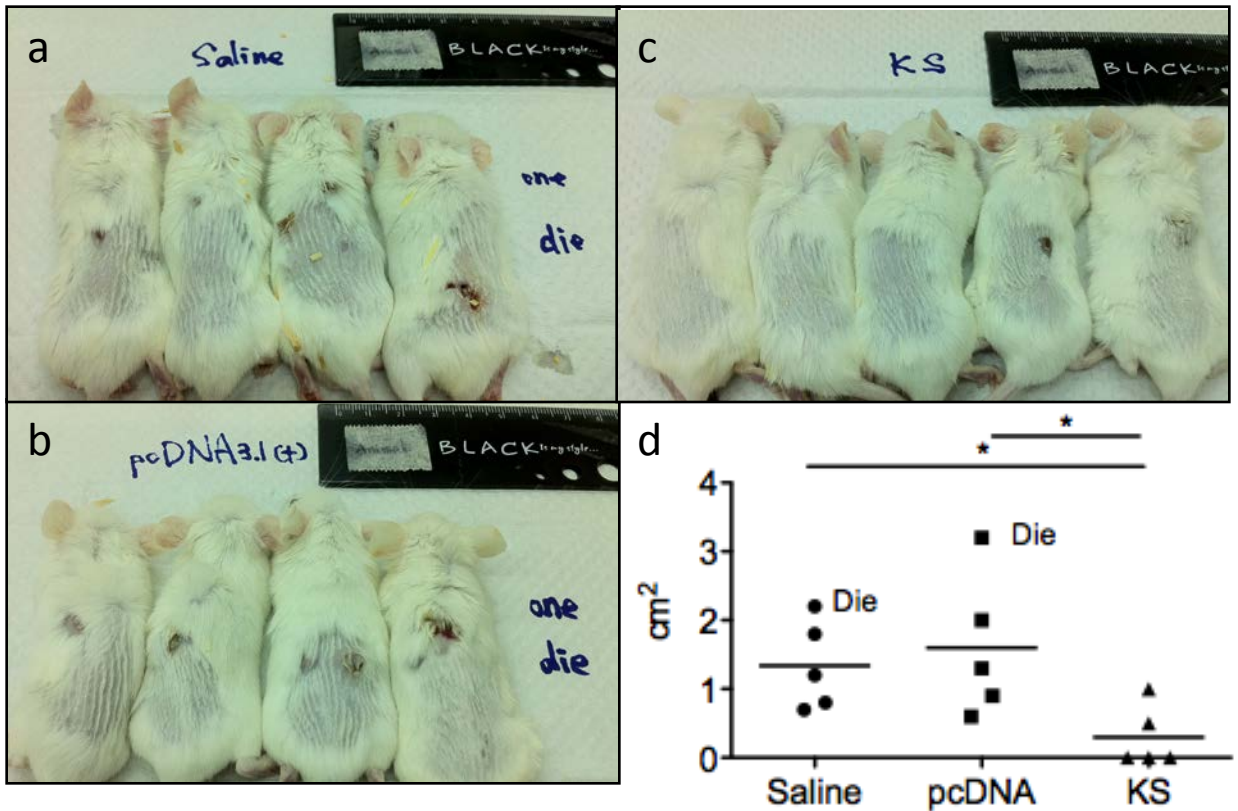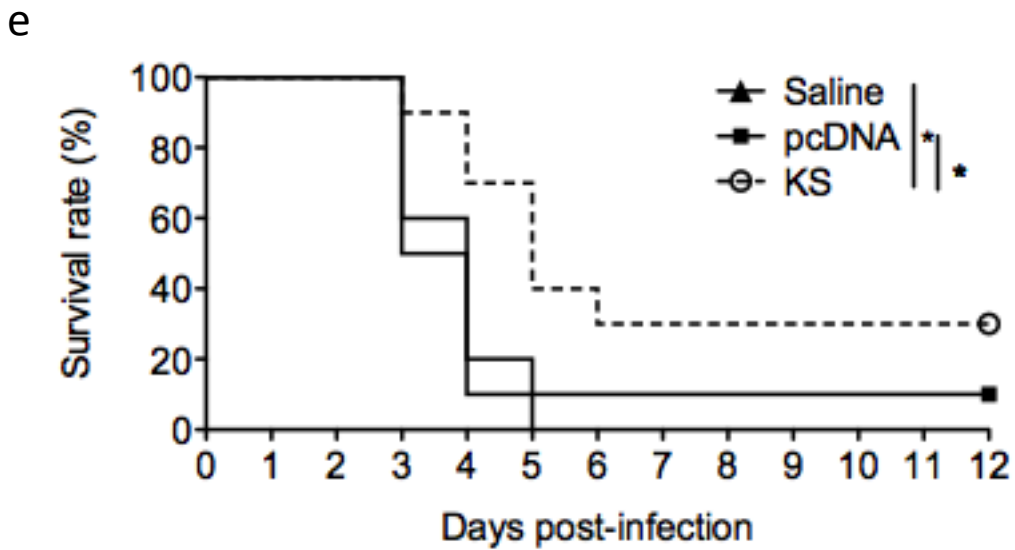

Supplementary Figure S5

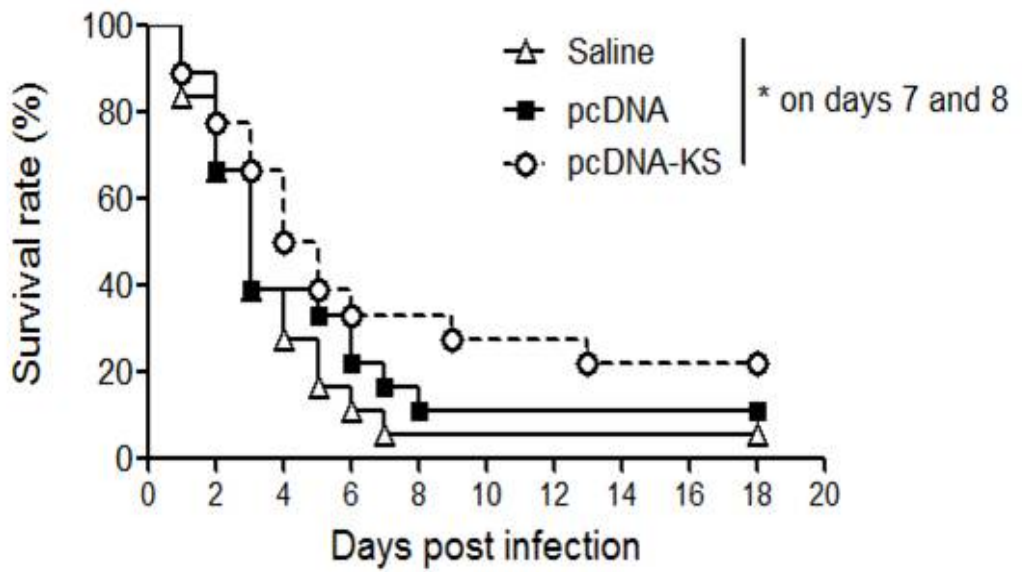

**Supplementary Figure S6**
